# Supplementary material for: On the efficiency of perovskite solar cells with a back reflector: effect of a hole transport material
Source: Royal Society of Chemistry journal article supplement (doi:10.1039/d1cp03313a), 2021-01-01
Supplement: d1cp03313a1.pdf [file d1cp03313a1.pdf]

# Supplementary Information for "On efficiency of perovskite solar cells with a back reflector: Effect of a hole transport material"

F. Bonnín-Ripoll<sup>1</sup>, Ya. B. Martynov<sup>2</sup>, R. G. Nazmitdinov<sup>3,4,\*</sup>,

G. Cardona<sup>5</sup>, R. Pujol-Nadal<sup>1</sup>

<sup>1</sup>*Departament d'Enginyeria Industrial i Construcció, Universitat de les Illes Balears, E-07122 Palma, Spain*

<sup>2</sup>*State Scientific-Production Enterprise "Istok" 141120 Fryazino, Russia*

<sup>3</sup>*Bogoliubov Laboratory of Theoretical Physics, Joint Institute for Nuclear Research, 141980 Dubna, Russia*

<sup>4</sup>*Dubna State University, 141982 Dubna, Moscow region, Russia*

<sup>5</sup>*Departament de Matemàtiques, Universitat de les Illes Balears, E-07122 Palma, Spain*

\*Author to whom correspondence should be addressed, e-mail: rashid@theor.jinr.ru

|                                                                                  |
|----------------------------------------------------------------------------------|
| Glass Substrate (2 mm)                                                           |
| SnO <sub>2</sub> (28 nm)                                                         |
| SiO <sub>2</sub> (23 nm)                                                         |
| FTO (340 nm)                                                                     |
| FTO - TiO <sub>2</sub> e. m. (29 nm)                                             |
| TiO <sub>2</sub> - CH <sub>3</sub> NH <sub>3</sub> PbI <sub>3</sub> e.m. (41 nm) |
| CH <sub>3</sub> NH <sub>3</sub> PbI <sub>3</sub> (492 nm)                        |
| Spiro-OMeTAD (253 nm)                                                            |
| Au (30 nm)                                                                       |

Figure 1: Schematic planar heterojunction configuration studied by Ball et al.[1], where the symbol "e.m." is the effective media.

To validate our approach, we use the experimental data from Ref.[1], provided for the p-i-n planar heterojunction configuration for a perovskite-based solar cell, shown in Fig.1. The device was illuminated with a solar simulator, which has the spectrum shown in Fig. S6 of Ref.[2], equivalent to 1.047 suns.

We recall that in Ref.[1] the optical properties have been analysed within an optical model based on the transfer-matrix formalism, using experimentally determined complex refractive index data. Our analysis of optical properties are done by means of the Monte-Carlo ray tracing simulations complemented by the transfer-matrix method (OT-Sun python package [3]). We use for each layer of the device the complex refractive index spectra, provided by Refs.[1],[2]. All calculations are done for a specular reflection case. In all figures, presented below, our results are indicated by the red color, while those from Ref.[1] are indicated by the green color.

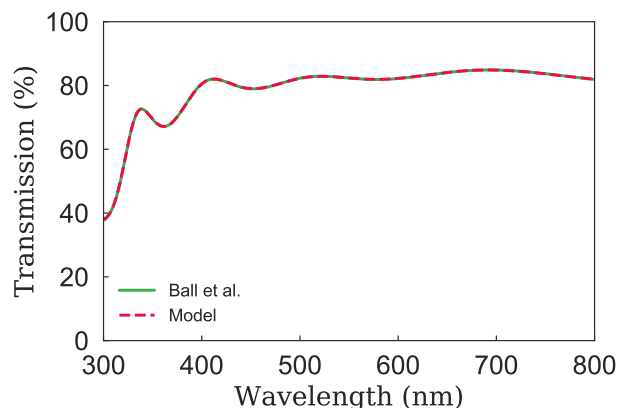

Figure 2: The comparison of the FTO-coated soda-lime glass substrate transmission spectrum obtained by Ball et al. [1] and by means of our TMM model implementation.

In order to determine the wavelength power transmission of the FTO-coated soda-lime glass substrate used in Ref.[1], we compare our TMM simulations with that, provided by Ref. [2] (see Fig.S1a, Ref.[2]). Evidently, the results are equivalent (see Fig.2), since the both TMM models are based on the Python library developed by Steve Byrnes [4]. The same agreement is obtained (see Fig.3) between our result for the reflectance and that, presented in Fig. 6 of Ref.[1]. Next important characteristic is the light-harvesting efficiency (LHE). It is obtained by means of the TMM in Ref.[1], while our results are obtained with the aid of the ray tracing simulations complemented by the TMM. The comparison between our results and those, presented in Fig.4a of Ref.[1], demonstrates a good agreement as well (see Fig.4). Note, however, that our model gives a slightly lower LHE. In our case the perovskite and Spiro-OMeTAD are considered as incoherent media.

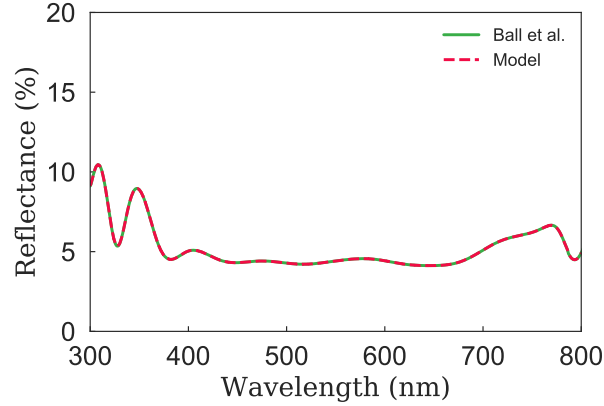

Figure 3: The comparison of the calculated reflectance spectra obtained by Ball et al.[1],[2] and by means of our TMM model implementation.

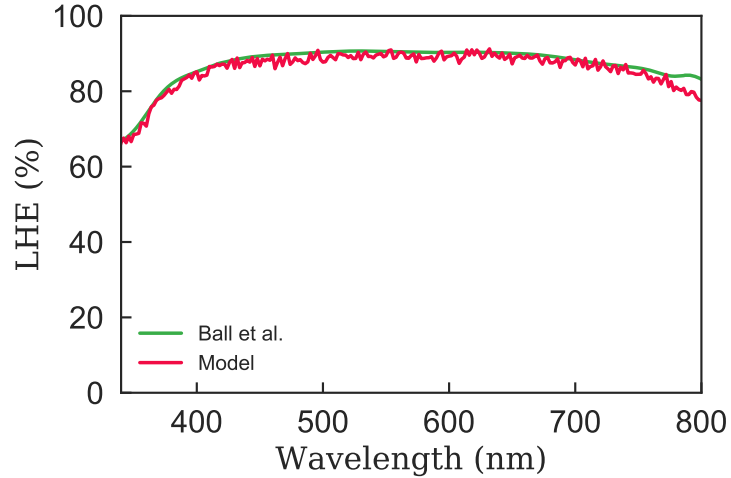

Figure 4: The comparison of the light-harvesting efficiency, obtained in Ref.[1], and our LHE, obtained by means of the ray tracing+TMM approach (the OTSun package) [3].)

To demonstrate the relevance of our model  $J(V)$  characteristic to experimental observations, we use the analogy of the PSC to a current generator in parallel with a diode. In addition, it is necessary to account for the parasitic resistance of the contacts and feeding conductors,  $R_s$ ; the leakage resistance  $R_{sh}$  related to the local short circuit of ETM/HTM layers. Thus, we analyse the equivalent circuit, shown in Fig.5. The intrinsic PSC current  $J_d + J_{sc}$  is evaluated by means of the numerical solution of the transport equations

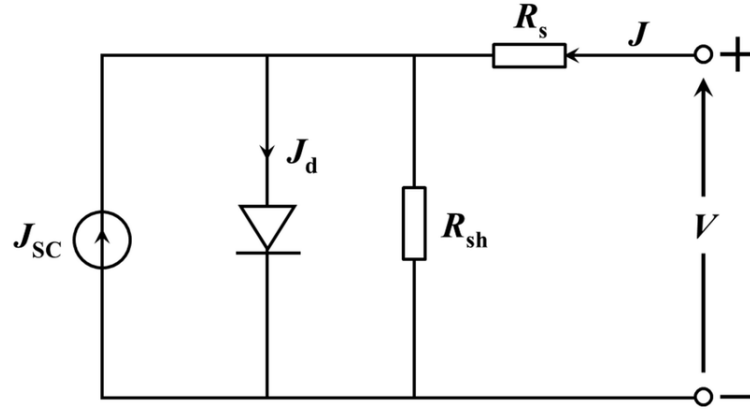

Figure 5: The circuit layout: i)  $R_s$  is a parasitic resistance of contacts and feeding conductors; ii)  $R_{sh}$  is associated with a leakage resistance related to the local short circuiting of ETM/HTM layers; iii)  $J_d$  is a dark current; iv)  $J_{sc}$  is a photogenerated current. The intrinsic PSC current is  $J_d + J_{sc}$ .

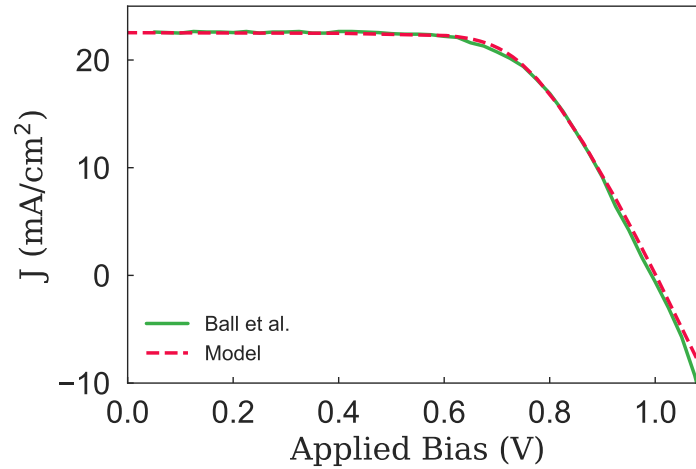

Figure 6: Measured and simulated J-V characteristics of the device used for validation.

(6-13), where we use the results of the optical calculations of the photogeneration rate  $G(z)$  (Eq.5) as the input. The electrical parameters have been taken from Table 1 of our paper. To reproduce the open circuit voltage value of the PSC [1], we use the diffusion length  $\ell_D = 2\mu\text{m}$  for the perovskite. Additionally, the best agreement between our and measured results for the short circuit current is obtained if we use the diffusion length

|            | PCE%  | $J_{sc}$ , mA/cm <sup>2</sup> | $V_{oc}$ , V | FF   | $J_{tot}$ , mA/cm <sup>2</sup> |
|------------|-------|-------------------------------|--------------|------|--------------------------------|
| Simulated  | 14.19 | 22.56                         | 1.00         | 0.66 | 24.80                          |
| Experiment | 13.80 | 22.60                         | 1.00         | 0.64 |                                |

Table 1: Simulated and measured main characteristics of the PSC [1].

$\ell_D = 0.04\mu\text{m}$  for  $\text{TiO}_2$ . The best fit of the simulated and measured J–V characteristics is obtained with  $R_s=8\text{ Ohm}\cdot\text{cm}^2$  and  $R_{sh}=10\text{ MOhm}\cdot\text{cm}^2$ . The comparison of the result for the J–V characteristics with that from Ref.[1] is displayed on Fig.6. Finally, Table 1 demonstrates the remarkable agreement between the model calculations and the experimental data. Thus, the comparison between our results for the optical and the electrical characteristics and those, provided by Ref.[1], demonstrates the vitality and the validity of our model.

## References

- [1] J.M. Ball, S.D. Stranks, M.T. Hörantner, S. Hüttner, W. Zhang, E.J.W. Crossland, I. Ramirez, M. Riede, M.B. Johnston, R.H. Friend, H.J. Snaith, *Optical properties and limiting photocurrent of thin-film perovskite solar cells*, Energy Environ. Sci.**8** (2015) 602-609. doi:10.1039/C4EE03224A
- [2] J.M. Ball et al., Energy Environ. Sci.**8** (2015) 602-609; Electronic Supplementary Information (ESI): Detailed description of methods, supplementary discussion sections S1-S3, Figures S1-S11, transfer-matrix code, and modelling data.
- [3] G. Cardona, R. Pujol-Nadal, *OTSun, a python package for the optical analysis of solar-thermal collectors and photovoltaic cells with arbitrary geometry*, PLOS ONE **15** (2020) e0240735. doi:10.1371/journal.pone.0240735.
- [4] Steven Byrnes, tmm 0.1.7: "Python Package Index", <https://github.com/sbyrnes321/tmm>.
